# Supplementary material for: Accumulation of Arachidonic Acid, Precursor of Pro-Inflammatory Eicosanoids, in Adipose Tissue of Obese Women: Association with Breast Cancer Aggressiveness Indicators
Source: MDPI journal article supplement (doi:10.3390/biomedicines10050995), 2022-04-26
Supplement: s1 [file s1]

Table S1: Fatty acid composition of mammary adipose tissue in breast cancer patients with normal body mass index (18.5-24.9 kg/m<sup>2</sup>) according to age categories (n = 123).

| Fatty acids <sup>†</sup> |          |             | Age categories      |       |                       |             |                         |              |                         |                 |                       |                         |                    |              |                         |                         |   |
|--------------------------|----------|-------------|---------------------|-------|-----------------------|-------------|-------------------------|--------------|-------------------------|-----------------|-----------------------|-------------------------|--------------------|--------------|-------------------------|-------------------------|---|
|                          |          |             | ≤39 years<br>n = 10 |       | 40–49 years<br>n = 39 |             | 50–59 years<br>n = 28   |              | 60–69 years<br>n = 23   |                 | 70–79 years<br>n = 16 |                         | ≥80 years<br>n = 7 |              |                         |                         |   |
|                          |          |             | Mean                | SD    | Mean                  | SD          | Mean                    | SD           | Mean                    | SD              | Mean                  | SD                      | Mean               | SD           |                         |                         |   |
| <b>Saturated</b>         |          |             |                     |       |                       |             |                         |              |                         |                 |                       |                         |                    |              |                         |                         |   |
| Myristic acid            | 14:0     | 3.98        | 0.78 <sup>s</sup>   | 3.65  | 0.44                  | 3.32        | 0.66*                   | <b>3.20</b>  | <b>0.59**</b>           | ↘               | <b>3.08</b>           | <b>0.45***</b>          | ↘                  | <b>3.11</b>  | <b>0.41*</b>            | ↘                       |   |
| Palmitic acid            | 16:0     | 23.74       | 2.18                | 23.35 | 1.80                  | 23.28       | 1.97                    | 21.72        | 2.35**                  |                 | 22.41                 | 2.87                    |                    | 21.64        | 3.08 <sup>s</sup>       |                         |   |
| Stearic acid             | 18:0     | 6.63        | 1.07                | 6.00  | 1.23                  | 5.99        | 1.19                    | <b>5.36</b>  | <b>1.19*</b>            | ↘               | <b>4.98</b>           | <b>0.87**</b>           | ↘                  | <b>5.03</b>  | <b>1.41*</b>            | ↘                       |   |
| LC-SFAs                  |          | <b>0.39</b> | <b>0.07*</b>        | 0.33  | 0.09                  | 0.32        | 0.09                    | <b>0.28</b>  | <b>0.08*</b>            | ↘               | <b>0.25</b>           | <b>0.11**</b>           | ↘                  | <b>0.26</b>  | <b>0.10<sup>s</sup></b> | ↘                       |   |
| Total SFAs               |          | 35.48       | 3.19                | 34.00 | 2.73                  | 33.53       | 2.96                    | 31.22        | 3.68***                 |                 | 31.33                 | 3.17**                  |                    | 30.70        | 4.23*                   |                         |   |
| <b>Mono-unsaturated</b>  |          |             |                     |       |                       |             |                         |              |                         |                 |                       |                         |                    |              |                         |                         |   |
| Myristoleic acid         | 14:1     | 0.31        | 0.10                | 0.31  | 0.11                  | 0.28        | 0.09                    | 0.27         | 0.09                    |                 | 0.29                  | 0.08                    |                    | 0.29         | 0.15                    |                         |   |
| Palmitoleic acid         | 16:1n-7c | 3.34        | 0.86                | 3.66  | 1.50                  | 3.81        | 1.24                    | 3.71         | 1.19                    |                 | 4.33                  | 1.20 <sup>s</sup>       |                    | 3.80         | 1.69                    |                         |   |
| Oleic acid               | 18:1n-9c | 43.05       | 2.27                | 43.29 | 1.83                  | 43.05       | 2.00                    | 43.88        | 2.70                    |                 | 42.82                 | 2.88                    |                    | 43.50        | 3.35                    |                         |   |
| Vaccenic acid            | 18:1n-7c | 1.70        | 0.12                | 1.77  | 0.26                  | 1.90        | 0.41                    | 1.92         | 0.41 <sup>s</sup>       |                 | <b>2.07</b>           | <b>0.37**</b>           | ↗                  | 1.86         | 0.32                    |                         |   |
| LC-MUFA                  |          | 0.84        | 0.19                | 0.88  | 0.17                  | 0.90        | 0.15                    | 0.93         | 0.17                    |                 | 0.86                  | 0.22                    |                    | 0.92         | 0.19                    |                         |   |
| Total MUFA               |          | 49.68       | 2.36                | 50.33 | 2.45                  | 50.38       | 2.93                    | 51.12        | 3.71                    |                 | 50.81                 | 3.31                    |                    | 50.75        | 4.23                    |                         |   |
| <b>Polyunsaturated</b>   |          |             |                     |       |                       |             |                         |              |                         |                 |                       |                         |                    |              |                         |                         |   |
| Linoleic acid            | 18:2n-6c | 9.62        | 1.90                | 10.42 | 1.58                  | 10.75       | 2.41                    | 11.69        | 2.09*                   |                 | <b>11.67</b>          | <b>3.42<sup>s</sup></b> | ↗                  | <b>12.57</b> | <b>2.55*</b>            | ↗                       |   |
| γ Linolenic acid         | 18:3n-6  | 0.04        | 0.00                | 0.05  | 0.02                  | 0.05        | 0.02                    | 0.05         | 0.01                    |                 | 0.06                  | 0.02*                   |                    | 0.05         | 0.01                    |                         |   |
| Eicosadienoic acid       | 20:2n-6  | 0.21        | 0.06 <sup>s</sup>   | 0.24  | 0.05                  | 0.26        | 0.05                    | <b>0.28</b>  | <b>0.05**</b>           |                 | <b>0.30</b>           | <b>0.06***</b>          |                    | <b>0.29</b>  | <b>0.03*</b>            |                         |   |
| Dihomo-γ-linoleic acid   | 20:3n-6  | 0.14        | 0.04                | 0.16  | 0.05                  | <b>0.19</b> | <b>0.09<sup>s</sup></b> | <b>0.25</b>  | <b>0.13<sup>s</sup></b> |                 | <b>0.35</b>           | <b>0.34*</b>            |                    | 0.27         | 0.08                    |                         |   |
| Arachidonic acid         | 20:4n-6  | 0.22        | 0.04                | 0.27  | 0.07                  | 0.31        | 0.08                    | <b>0.39</b>  | <b>0.15***</b>          | ↗               | <b>0.47</b>           | <b>0.20****</b>         | ↗                  | <b>0.40</b>  | <b>0.13**</b>           | ↗                       |   |
| Docosatetraenoic acid)   | 22:4n-6  | 0.08        | 0.03                | 0.11  | 0.05                  | 0.14        | 0.09                    | <b>0.20</b>  | <b>0.10***</b>          |                 | <b>0.25</b>           | <b>0.16****</b>         |                    | <b>0.23</b>  | <b>0.07**</b>           |                         |   |
| LC-PUFA n-6              |          | 0.66        | 0.15                | 0.80  | 0.18                  | 0.92        | 0.27                    | <b>1.13</b>  | <b>0.38***</b>          | ↗               | <b>1.38</b>           | <b>0.72****</b>         | ↗                  | <b>1.20</b>  | <b>0.22**</b>           | ↗                       |   |
| <b>Total PUFA n-6</b>    |          | 10.35       | 2.00                | 11.30 | 1.30                  | 11.74       | 2.39                    | <b>12.90</b> | <b>2.27**</b>           | ↗               | <b>13.13</b>          | <b>3.46**</b>           | ↗                  | <b>13.85</b> | <b>2.49**</b>           |                         |   |
|                          |          |             |                     |       |                       |             |                         |              |                         |                 |                       |                         |                    |              |                         |                         |   |
| Alpha linolenic acid     | 18:3n-3  | 0.60        | 0.15                | 0.64  | 0.16                  | 0.65        | 0.21                    | 0.64         | 0.22                    |                 | 0.65                  | 0.18                    |                    | 0.66         | 0.27                    |                         |   |
| Eicosatrienoic acid      | 20:3n-3  | 0.03        | 0.01                | 0.03  | 0.01                  | 0.04        | 0.01 <sup>s</sup>       | <b>0.04</b>  | <b>0.01*</b>            |                 | <b>0.04</b>           | <b>0.01*</b>            |                    | 0.04         | 0.01                    |                         |   |
| Eicosapentaenoic acid    | 20:5n-3  | 0.07        | 0.03                | 0.08  | 0.03                  | 0.10        | 0.05                    | 0.10         | 0.04                    |                 | <b>0.11</b>           | <b>0.07*</b>            | ↗                  | 0.10         | 0.06                    |                         |   |
| Docosapentaenoic acid    | 22:5n-3  | 0.14        | 0.05                | 0.18  | 0.06                  | <b>0.23</b> | <b>0.09*</b>            | ↗            | <b>0.29</b>             | <b>0.11****</b> | ↗                     | <b>0.33</b>             | <b>0.12****</b>    | ↗            | <b>0.28</b>             | <b>0.07**</b>           | ↗ |
| Docosahexaenoic acid     | 22:6n-3  | 0.12        | 0.06                | 0.16  | 0.05                  | <b>0.20</b> | <b>0.10*</b>            | ↗            | <b>0.25</b>             | <b>0.12***</b>  | ↗                     | <b>0.28</b>             | <b>0.13****</b>    | ↗            | <b>0.23</b>             | <b>0.07*</b>            | ↗ |
| LC-PUFA n-3              |          | 0.37        | 0.14                | 0.45  | 0.12                  | <b>0.56</b> | <b>0.22*</b>            | ↗            | <b>0.67</b>             | <b>0.24****</b> | ↗                     | <b>0.76</b>             | <b>0.29****</b>    | ↗            | <b>0.65</b>             | <b>0.13*</b>            | ↗ |
| <b>Total PUFA n-3</b>    |          | 0.97        | 0.24                | 1.10  | 0.21                  | <b>1.21</b> | <b>0.29<sup>s</sup></b> | ↗            | <b>1.33</b>             | <b>0.34**</b>   | ↗                     | <b>1.42</b>             | <b>0.37***</b>     | ↗            | <b>1.31</b>             | <b>0.32<sup>s</sup></b> | ↗ |

| Ratio           |       |      |       |      |       |      |       |      |             |              |       |      |
|-----------------|-------|------|-------|------|-------|------|-------|------|-------------|--------------|-------|------|
| PUFA n-6/n-3    | 10.99 | 1.90 | 10.85 | 2.86 | 10.10 | 2.48 | 10.42 | 3.64 | 9.66        | 2.68         | 10.99 | 2.86 |
| LC-PUFA n-6/n-3 | 2.04  | 0.77 | 1.90  | 0.60 | 1.83  | 0.76 | 1.81  | 0.58 | 1.94        | 0.92         | 1.96  | 0.72 |
| 20:4n-6/20:5n-3 | 3.87  | 2.15 | 3.89  | 1.96 | 4.19  | 2.47 | 4.64  | 2.32 | <b>5.43</b> | <b>3.26*</b> | 5.28  | 2.76 |

<sup>†</sup> expressed as % area, data are mean (SD: standard deviation), SFA: saturated fatty acids, MUFA: monounsaturated fatty acids, PUFA: polyunsaturated fatty acids, LC: long chain fatty acids between 20 and 24 carbons. Women included in this study were divided into age categories (every 10 years), and fatty acid content was expressed as mean with SD. Statistical analysis: ANOVA followed by Fisher's LSD test for multiple comparisons using a reference subgroup (i.e., 40-49 year category) for comparison with other age categories and variation > 10% was highlighted by bold numbers and an up or down arrow for positive or negative variation compared to the reference subgroup.

\$ 0.05<p<0.1, \*p≤0.05, \*\*p<0.01, \*\*\*p<0.001, \*\*\*\*p<0.0001

*Table S2: Fatty acid composition of mammary adipose tissue in breast cancer patients according to body mass index categories in patients aged 40–49 years (n = 60).*

| Fatty acids <sup>†</sup> | BMI categories       |                   |                  |      |                      |               |                |                         |   |
|--------------------------|----------------------|-------------------|------------------|------|----------------------|---------------|----------------|-------------------------|---|
|                          | Underweight<br>n = 3 |                   | Normal<br>n = 40 |      | Overweight<br>n = 12 |               | Obese<br>n = 6 |                         |   |
|                          | Mean                 | SD                | Mean             | SD   | Mean                 | SD            | Mean           | SD                      |   |
| <b>Saturated</b>         |                      |                   |                  |      |                      |               |                |                         |   |
| 14:0                     | 3.68                 | 1.76              | 3.65             | 0.44 | <b>3.02</b>          | <b>0.51**</b> | ↘ <b>3.11</b>  | <b>0.40*</b>            | ↘ |
| 16:0                     | 23.49                | 3.08              | 23.35            | 1.80 | 23.62                | 1.24          | 24.60          | 2.15                    |   |
| 18:0                     | 6.07                 | 1.82              | 6.00             | 1.23 | 5.87                 | 1.02          | 5.38           | 0.71                    |   |
| LC SFA                   | 0.30                 | 0.13              | 0.33             | 0.09 | <b>0.26</b>          | <b>0.06*</b>  | ↘ <b>0.23</b>  | <b>0.04**</b>           | ↘ |
| Total SFA                | 34.27                | 6.91              | 34.00            | 2.73 | 33.38                | 2.23          | 33.99          | 3.04                    |   |
| <b>Mono-unsaturated</b>  |                      |                   |                  |      |                      |               |                |                         |   |
| 14:1                     | 0.26                 | 0.22              | 0.31             | 0.11 | 0.24                 | 0.07*         | 0.24           | 0.09                    |   |
| 16:1n-7c                 | 3.26                 | 1.53              | 3.66             | 1.50 | 3.24                 | 1.20          | 3.36           | 0.77                    |   |
| 18:1n-9c                 | 41.24                | 3.57 <sup>§</sup> | 43.29            | 1.83 | 44.62                | 1.78*         | 42.97          | 1.72                    |   |
| 18:1n-7c                 | 1.65                 | 0.16 <sup>§</sup> | 1.77             | 2.67 | 1.78                 | 0.26          | <b>2.00</b>    | <b>0.23*</b>            | ↗ |
| LC-MUFA                  | 0.70                 | 0.14 <sup>§</sup> | 0.88             | 0.17 | 0.86                 | 0.14          | 0.94           | 0.18                    |   |
| <b>Total MUFA</b>        | 47.54                | 2.00 <sup>§</sup> | 50.33            | 2.45 | 51.11                | 2.79          | 50.09          | 1.86                    |   |
| <b>Polyunsaturated</b>   |                      |                   |                  |      |                      |               |                |                         |   |
| 18:2n-6c                 | 12.47                | 4.58 <sup>§</sup> | 10.42            | 1.58 | 10.45                | 2.42          | 10.34          | 2.24                    |   |
| 18:3n-6                  | 0.05                 | 0.01              | 0.05             | 0.02 | 0.04                 | 0.01          | 0.05           | 0.01                    |   |
| 20:2n-6                  | 0.23                 | 0.08              | 0.24             | 0.05 | 0.26                 | 0.05          | <b>0.32</b>    | <b>0.08**</b>           | ↗ |
| 20:3n-6                  | 0.22                 | 0.10              | 0.16             | 0.05 | <b>0.24</b>          | <b>0.13**</b> | ↗ <b>0.29</b>  | <b>0.12***</b>          | ↗ |
| 20:4n-6                  | 0.31                 | 0.07              | 0.28             | 0.07 | <b>0.36</b>          | <b>0.11**</b> | ↗ <b>0.42</b>  | <b>0.08****</b>         | ↗ |
| 22:4n-6                  | 0.12                 | 0.05              | 0.11             | 0.05 | <b>0.16</b>          | <b>0.08*</b>  | ↗ <b>0.25</b>  | <b>0.14****</b>         | ↗ |
| LC-PUFA n-6              | 0.82                 | 0.22              | 0.82             | 0.22 | <b>1.03</b>          | <b>0.34*</b>  | ↗ <b>1.29</b>  | <b>0.39***</b>          | ↗ |
| <b>Total PUFA n-6</b>    | 13.42                | 4.83 <sup>§</sup> | 11.30            | 1.63 | 11.55                | 2.56          | 11.71          | 2.28                    |   |
| 18:3n-3                  | 0.59                 | 0.17              | 0.64             | 0.16 | 0.60                 | 0.14          | 0.56           | 0.20                    |   |
| 20:3n-3                  | 0.03                 | 0.01              | 0.03             | 0.01 | 0.03                 | 0.01          | <b>0.04</b>    | <b>0.01*</b>            |   |
| 20:5n-3                  | 0.08                 | 0.06              | 0.08             | 0.06 | <b>0.06</b>          | <b>0.02*</b>  | ↘ <b>0.06</b>  | <b>0.02<sup>§</sup></b> |   |
| 22:5n-3                  | 0.19                 | 0.05              | 0.18             | 0.06 | 0.18                 | 0.07          | <b>0.23</b>    | <b>0.04*</b>            | ↗ |
| 22:6n-3                  | <b>0.23</b>          | <b>0.02*</b>      | 0.16             | 0.05 | 0.14                 | 0.05          | 0.15           | 0.03                    |   |
| LC-PUFA n-3              | 0.50                 | 0.11              | 0.45             | 0.12 | 0.42                 | 0.12          | 0.48           | 0.08                    |   |
| <b>Total PUFA n-3</b>    | 1.12                 | 0.20              | 1.08             | 0.21 | 1.01                 | 0.19          | 1.04           | 0.26                    |   |
| <b>Ratio</b>             |                      |                   |                  |      |                      |               |                |                         |   |
| PUFA n-6/n-3             | 12.00                | 3.32              | 10.85            | 2.86 | 11.69                | 2.80          | 11.73          | 3.08                    |   |
| LC-PUFA n-6/n-3          | 1.72                 | 0.62              | 1.90             | 0.60 | <b>2.59</b>          | <b>0.82**</b> | <b>1.17</b>    | <b>0.48**</b>           |   |
| 20:4n-6/20:5n-3          | 5.24                 | 3.58              | 3.89             | 1.96 | <b>6.48</b>          | <b>3.10*</b>  | <b>9.74</b>    | <b>8.93***</b>          |   |

<sup>†</sup> expressed as % area, data are mean (SD: standard deviation), SFA: saturated fatty acids, MUFA: monounsaturated fatty acids, PUFA: polyunsaturated fatty acids, LC: long chain fatty acids between 20 and 24 carbons.

Women included in this study were divided by age categories (every 10 years), and fatty acid levels expressed as mean with SD. Statistical analysis: ANOVA followed by Fisher's LSD test for multiple comparisons using a reference subgroup (i.e., normal BMI category) for comparison with other BMI categories and variation > 10% was highlighted by bold numbers and an up or down arrow for positive or negative variation (respectively) compared to the reference subgroup.

On the right, correlation coefficient between BMI and each fatty acid level in adipose tissue

§ 0.05<p<0.1, \*p<0.05, \*\*p<0.01, \*\*\*p<0.001, \*\*\*\*p<0.0001

*Table S3: Correlation coefficients between fatty acid contents and age or body mass index (BMI) in mammary adipose tissue of breast cancer patients*

|                          | Correlation with age            |      | Correlation with BMI |      |                       |      |                       |      |                       |      |                       |    |                     |    |
|--------------------------|---------------------------------|------|----------------------|------|-----------------------|------|-----------------------|------|-----------------------|------|-----------------------|----|---------------------|----|
|                          | In normal body women<br>n = 123 |      | ≤39 years<br>n = 26  |      | 40–49 years<br>n = 60 |      | 50–59 years<br>n = 68 |      | 60–69 years<br>n = 51 |      | 70–79 years<br>n = 38 |    | ≥80 years<br>n = 18 |    |
| Fatty acids <sup>†</sup> | r                               | p    | r                    | p    | r                     | p    | r                     | p    | r                     | p    | r                     | p  | r                   | p  |
| <b>Saturated</b>         |                                 |      |                      |      |                       |      |                       |      |                       |      |                       |    |                     |    |
| 14:0                     | -0.42                           | **** | -0.53                | **   | -0.48                 | ***  | -0.37                 | **   | -0.38                 | **   | -0.34                 | *  | -0.59               | ** |
| 16:0                     | -0.31                           | ***  | +0.14                |      | 0.17                  |      | +0.18                 |      | +0.17                 |      | +0.03                 |    | -0.26               |    |
| 18:0                     | -0.36                           | **** | -0.56                | **   | -0.22                 | §    | -0.22                 | §    | -0.43                 | **   | -0.32                 | *  | -0.63               | ** |
| 20:0                     | -0.41                           | **** | -0.72                | **** | -0.45                 | ***  | -0.54                 | **** | -0.61                 | **** | -0.48                 | ** | -0.65               | ** |
| 22:0                     | -0.32                           | ***  | -0.71                | **** | -0.42                 | ***  | -0.42                 | ***  | -0.43                 | ***  | -0.12                 |    | -0.14               |    |
| LC-SFA                   | -0.35                           | **** | -0.74                | **** | -0.45                 | ***  | -0.48                 | **** | -0.58                 | **** | -0.40                 | *  | -0.60               | ** |
| Total SFA                | -0.43                           | **** | -0.34                | §    | -0.11                 |      | -0.06                 |      | -0.14                 |      | -0.14                 |    | -0.52               | *  |
| <b>Monounsaturated</b>   |                                 |      |                      |      |                       |      |                       |      |                       |      |                       |    |                     |    |
| 14:1                     | -0.08                           |      | -0.33                |      | -0.27                 | §    | -0.38                 | **   | +0.01                 |      | -0.15                 |    | +0.03               |    |
| 16:1n-7c                 | +0.15                           |      | -0.09                |      | -0.13                 |      | -0.16                 |      | +0.21                 |      | -0.07                 |    | +0.26               |    |
| 18:1n-9c                 | +0.05                           |      | +0.27                |      | +0.21                 |      | -0.10                 |      | +0.12                 |      | +0.30                 | §  | +0.33               |    |
| 18:1n-7c                 | +0.25                           | **   | +0.59                | **   | +0.31                 | §    | +0.19                 |      | +0.41                 | **   | +0.19                 |    | +0.67               | ** |
| LC-MUFA                  | +0.10                           |      | +0.20                |      | +0.21                 |      | +0.08                 |      | -0.08                 |      | +0.04                 |    | -0.19               |    |
| Total MUFA               | +0.13                           |      | +0.25                |      | +0.14                 |      | -0.12                 |      | +0.20                 |      | +0.24                 |    | +0.36               |    |
| <b>Polyunsaturated</b>   |                                 |      |                      |      |                       |      |                       |      |                       |      |                       |    |                     |    |
| 18:2n-6c                 | +0.33                           | ***  | +0.10                |      | -0.05                 |      | +0.04                 |      | -0.13                 |      | -0.12                 |    | +0.07               |    |
| 18:3n-6                  | +0.23                           | **   | -0.19                |      | +0.01                 |      | +0.04                 |      | +0.04                 |      | +0.04                 |    | -0.04               |    |
| 20:2n-6                  | +0.44                           | **** | +0.55                | **   | +0.50                 | **** | +0.42                 | ***  | +0.40                 | **   | +0.28                 | §  | +0.32               |    |
| 20:3n-6                  | +0.35                           | **** | +0.57                | **   | +0.49                 | ***  | +0.63                 | **** | +0.30                 | *    | +0.17                 |    | +0.47               | §  |
| 20:4n-6                  | +0.50                           | **** | +0.67                | ***  | +0.52                 | **** | +0.63                 | **** | +0.31                 | *    | +0.43                 | ** | +0.31               |    |
| 22:4n-6                  | +0.49                           | **** | +0.59                | **   | +0.60                 | **** | +0.59                 | **** | +0.33                 | *    | +0.42                 | ** | +0.40               | §  |
| LC PUFA n-6              | +0.48                           | **** | +0.64                | ***  | +0.57                 | **** | +0.64                 | **** | +0.37                 | *    | +0.34                 | *  | +0.47               | *  |
| <b>Total PUFA n-6</b>    | +0.39                           | **** | +0.20                |      | +0.03                 |      | +0.13                 |      | -0.07                 |      | -0.06                 |    | +0.11               |    |
| 18:3n-3                  | +0.05                           |      | -0.27                |      | +0.08                 |      | -0.25                 | *    | -0.23                 |      | -0.17                 |    | +0.20               |    |
| 20:3n-3                  | +0.29                           | **   | +0.43                | *    | +0.39                 | **   | +0.18                 |      | +0.23                 | §    | +0.17                 |    | +0.39               |    |
| 20:5n-3                  | +0.23                           | §    | +0.04                |      | -0.29                 | *    | -0.18                 |      | -0.17                 |      | -0.18                 |    | -0.10               |    |
| 22:5n-3                  | +0.56                           | **** | +0.47                | *    | +0.36                 | **   | +0.47                 | **** | +0.14                 |      | +0.13                 |    | +0.28               |    |
| 22:6n-3                  | +0.45                           | **** | +0.29                |      | -0.18                 |      | +0.24                 | *    | -0.04                 |      | -0.10                 |    | +0.13               |    |
| LC-PUFA n-3              | +0.50                           | **** | +0.36                | §    | +0.05                 |      | +0.29                 | *    | -0.02                 |      | -0.03                 |    | +0.18               |    |
| <b>Total PUFA n-3</b>    | +0.40                           | **** | +0.07                |      | -0.03                 |      | +0.03                 |      | -0.13                 |      | -0.09                 |    | +0.27               |    |
| <b>Ratio</b>             |                                 |      |                      |      |                       |      |                       |      |                       |      |                       |    |                     |    |
| PUFA n6/n3               | -0.07                           |      | +0.112               |      | +0.06                 |      | +0.06                 |      | +0.08                 |      | +0.04                 |    | -0.21               |    |
| LC-PUFA n6/n3            | -0.03                           |      | +0.22                |      | +0.43                 | **   | +0.21                 | §    | +0.33                 | *    | +0.34                 | *  | +0.11               |    |
| 20:4n6/20:5n3            | +0.21                           | *    | +0.29                |      | +0.46                 | **** | +0.37                 | **   | +0.36                 | **   | +0.41                 | ** | +0.17               |    |

<sup>†</sup> expressed as % area, SD: standard deviation, SFA: saturated fatty acids, MUFA: monounsaturated fatty acids, PUFA: polyunsaturated fatty acids, LC: long chain fatty acids between 20 and 24 carbons. To establish correlations between fatty acid content and age, only women with normal BMI were included (left column of table). To establish correlations between fatty acid content and

BMI, women were divided by age category (right columns of table). Statistical analysis: Pearson's test (with correlation coefficient  $r$  and  $p$   $0.05 < p \leq 0.1$ ,  $*p < 0.05$ ,  $**p < 0.01$ ,  $***p < 0.001$ ,  $****p < 0.0001$ )

*Table S4: Demographic and histological characteristics of breast cancer women (n = 261) according to BMI categories.*

|                                      | <b>BMI categories</b>      |                            |                            |                            | P value           |
|--------------------------------------|----------------------------|----------------------------|----------------------------|----------------------------|-------------------|
|                                      | Underweight<br>n = 12      | Normal<br>n = 123          | Overweight<br>n = 76       | Obese<br>n = 50            |                   |
|                                      | Mean (SD) or<br>number (%) |                   |
| Age (years)                          | 47.2 (14.2)                | 55.7 (13.2)                | 58.6 (13.2)                | 59.3 (15.1)                | <b>0.02</b>       |
| BMI (kg/m <sup>2</sup> )             | 17.3 (1.5)                 | 21.9 (1.6)                 | 26.8 (1.4)                 | 33.5 (3.4)                 | <b>&lt;0.0001</b> |
| <b>Fatty acids</b>                   |                            |                            |                            |                            |                   |
| LC-SFA                               | 0.34 (0.10)                | 0.31 (0.10)                | 0.23 (0.06)                | 0.19 (0.06)                | <b>&lt;0.0001</b> |
| LC-MUFA                              | 0.84 (0.20)                | 0.89 (0.17)                | 0.88 (0.16)                | 0.90 (0.17)                | 0.72              |
| 20:4n-6 (arachidonic acid)           | 0.29 (0.12)                | 0.33 (0.13)                | 0.43 (0.14)                | 0.50 (0.16)                | <b>&lt;0.0001</b> |
| LC-PUFA n-6                          | 0.86 (0.34)                | 0.98 (0.41)                | 1.26 (0.37)                | 1.48 (0.41)                | <b>&lt;0.0001</b> |
| LC-PUFA n-3                          | 0.55 (0.25)                | 0.56 (0.23)                | 0.64 (0.28)                | 0.66 (0.22)                | <b>0.03</b>       |
| <b>Ratios</b>                        |                            |                            |                            |                            |                   |
| PUFA n-6/n-3                         | 11.11 (3.08)               | 10.46 (2.84)               | 11.17 (4.23)               | 10.87 (3.22)               | 0.51              |
| 20:4n-6/20:5n-3                      | 4.38 (2.40)                | 4.38 (2.42)                | 6.15 (3.40)                | 7.30 (4.20)                | <b>&lt;0.0001</b> |
| LC-PUFA n-6/n-3                      | 1.81 (0.80)                | 1.89 (0.69)                | 2.19 (0.82)                | 2.36 (0.73)                | <b>0.0005</b>     |
| <b>Tumor phenotype</b>               |                            |                            |                            |                            |                   |
| Luminal A                            | 4 (36.3%)                  | 47 (38.2%)                 | 21 (27.6%)                 | 16 (32.0%)                 | 0.69              |
| Luminal B                            | 5 (45.5%)                  | 29 (23.6%)                 | 25 (32.3%)                 | 16 (32.0%)                 |                   |
| HER2                                 | 1 (9.1%)                   | 15 (12.2%)                 | 12 (15.8%)                 | 7 (14.0%)                  |                   |
| Triple negative                      | 1 (9.1%)                   | 32 (26.0%)                 | 18 (23.7%)                 | 11 (22.0%)                 |                   |
| UK                                   | 1 (9.1%)                   | -                          | -                          | -                          |                   |
| <b>Tumor grade</b>                   |                            |                            |                            |                            |                   |
| 1                                    | 2 (16.6%)                  | 6 (4.9%)                   | 9 (11.8%)                  | 6 (12.0%)                  | 0.17              |
| 2                                    | 2 (16.6%)                  | 62 (50.4%)                 | 31 (40.8%)                 | 23 (46.0%)                 |                   |
| 3                                    | 7 (58.3%)                  | 53 (43.1%)                 | 36 (47.4%)                 | 19 (38.0%)                 |                   |
| UK                                   | 1 (8.3%)                   | 2 (1.6%)                   | -                          | 2 (4.0%)                   |                   |
| <b>Tumor size</b>                    | 22.58 (11.13)              | 26.65 (15.70)              | 31.22 (23.48)              | 31.56 (19.48)              | 0.16              |
| <b>Multifocal tumor</b>              | 2 (16.36%)                 | 28 (22.7%)                 | 20 (26.3%)                 | 11 (22%)                   | 0.82              |
| <b>Axillary positive LN</b>          | 4 (33.3%)                  | 57 (46.3%)                 | 33 (43.4%)                 | 31 (62.0%)                 | 0.12              |
| <b>Inflammatory Breast cancer</b>    | 0 (0%)                     | 10 (8.1%)                  | 9 (11.8%)                  | 9 (18%)                    | 0.15              |
| <b>With ductal carcinoma in situ</b> | 10 (83.3%)                 | 71 (57.8%)                 | 41 (53.9%)                 | 20 (40%)                   | <b>0.03</b>       |

HBP: high blood pressure; BMI: Body mass index; LN: Lymph node; SFA: saturated fatty acids, MUFA: monounsaturated fatty acids, PUFA: polyunsaturated fatty acids, LC: long chain fatty acids between 20 and 24 carbons. UK: Unknown
